# Supplementary material for: Mechanisms of photoreactivity in hydrogen-bonded adenine–H2O complexes
Source: Royal Society of Chemistry journal article supplement (doi:10.1039/c8cp05305g), 2018-12-07
Supplement: c8cp05305g1.pdf [file c8cp05305g1.pdf]

Electronic Supplementary Information for  
Mechanisms of photoreactivity in hydrogen-bonded adenine-H<sub>2</sub>O complexes

Xiuxiu Wu<sup>1</sup>, Johannes Ehrmaier<sup>1</sup>, Andrzej L. Sobolewski<sup>2</sup>, Tolga N.V. Karsili<sup>3</sup>, and Wolfgang  
Domcke\*<sup>1</sup>

<sup>1</sup> *Department of Chemistry, Technical University of Munich, D-85747 Garching, Germany*

<sup>2</sup> *Institute of Physics, Polish Academy of Sciences, PL-02668 Warsaw, Poland*

<sup>3</sup> *Department of Chemistry, University of Louisiana at Lafayette, LA 70504 USA*

Cartesian coordinates of the ground-state minimum-energy structures of isolated adenine (a), five conformers of the adenine-H<sub>2</sub>O hydrogen-bonded complex (b), (c), (d), (e) and (f), the isolated N3 (adenine+H) radical (g) and the complex of the (adenine+H) radical with a water molecule (h), optimized with *C<sub>s</sub>* symmetry constraint (MP2/cc-pVDZ level, standard XYZ format in Angstrom).

(a) Isolated adenine:

|   |              |              |             |
|---|--------------|--------------|-------------|
| N | -1.113490006 | 1.077018165  | 0.000000000 |
| C | -0.387436863 | 2.248753826  | 0.000000000 |
| H | -0.871517873 | 3.223345838  | 0.000000000 |
| N | 0.934254744  | 2.053595481  | 0.000000000 |
| C | 1.054575447  | 0.671818587  | 0.000000000 |
| C | 2.184692075  | -0.183554119 | 0.000000000 |
| N | 3.455631618  | 0.301958162  | 0.000000000 |
| H | 4.230481872  | -0.346809582 | 0.000000000 |
| H | 3.616175224  | 1.299610908  | 0.000000000 |
| N | 1.990055802  | -1.517713361 | 0.000000000 |
| C | 0.713329373  | -1.985491243 | 0.000000000 |
| H | 0.617932576  | -3.074128994 | 0.000000000 |
| N | -0.440379239 | -1.292284640 | 0.000000000 |
| C | -0.202063984 | 0.035314453  | 0.000000000 |
| H | -2.123425833 | 0.983150286  | 0.000000000 |

(b) adenine-H<sub>2</sub>O complex

|   |              |              |             |
|---|--------------|--------------|-------------|
| N | -1.153264430 | 0.997457246  | 0.000000000 |
| C | -0.549824378 | 2.236672183  | 0.000000000 |
| H | -1.129857429 | 3.157324789  | 0.000000000 |
| N | 0.785058722  | 2.176225529  | 0.000000000 |
| C | 1.043427317  | 0.814585104  | 0.000000000 |
| C | 2.255665760  | 0.081508389  | 0.000000000 |
| N | 3.467465614  | 0.698464284  | 0.000000000 |
| H | 4.312249011  | 0.144456847  | 0.000000000 |
| H | 3.516563459  | 1.708081685  | 0.000000000 |
| N | 2.191162929  | -1.264986857 | 0.000000000 |
| C | 0.967883771  | -1.867050121 | 0.000000000 |
| H | 0.992319147  | -2.959557010 | 0.000000000 |
| N | -0.245172212 | -1.291236246 | 0.000000000 |
| C | -0.141799860 | 0.054019916  | 0.000000000 |
| H | -2.148652604 | 0.801403767  | 0.000000000 |
| H | 3.357181428  | -2.841661243 | 0.000000000 |
| O | 3.603622264  | -3.788043857 | 0.000000000 |
| H | 4.567989993  | -3.793067101 | 0.000000000 |

(c) adenine-H<sub>2</sub>O complex

|   |              |              |             |
|---|--------------|--------------|-------------|
| N | -1.121621831 | 0.677091711  | 0.000000000 |
| C | -0.559935651 | 1.932121469  | 0.000000000 |
| H | -1.170173341 | 2.832932434  | 0.000000000 |
| N | 0.779224334  | 1.921683736  | 0.000000000 |
| C | 1.085719433  | 0.571306286  | 0.000000000 |
| C | 2.319615605  | -0.125594460 | 0.000000000 |
| N | 3.513053042  | 0.524627418  | 0.000000000 |
| H | 4.368361184  | -0.013782432 | 0.000000000 |
| H | 3.537121407  | 1.535055243  | 0.000000000 |
| N | 2.307717364  | -1.475546799 | 0.000000000 |
| C | 1.109504636  | -2.112152944 | 0.000000000 |
| H | 1.160067353  | -3.203703211 | 0.000000000 |
| N | -0.125448944 | -1.576822306 | 0.000000000 |
| C | -0.076539632 | -0.224086252 | 0.000000000 |
| H | -2.107192568 | 0.407972400  | 0.000000000 |
| H | -2.058802572 | -1.867191418 | 0.000000000 |
| O | -2.930474067 | -1.416240977 | 0.000000000 |
| H | -3.595710903 | -2.114034725 | 0.000000000 |

(d) adenine-H<sub>2</sub>O complex

|   |              |             |             |
|---|--------------|-------------|-------------|
| N | -1.258132915 | 0.972299216 | 0.000000000 |
| C | -0.640793360 | 2.198706543 | 0.000000000 |
| H | -1.202230761 | 3.130457779 | 0.000000000 |
| N | 0.692351009  | 2.109592182 | 0.000000000 |

|   |              |              |             |
|---|--------------|--------------|-------------|
| C | 0.942179453  | 0.741554616  | 0.000000000 |
| C | 2.140960527  | -0.028171946 | 0.000000000 |
| N | 3.380041055  | 0.515880837  | 0.000000000 |
| H | 4.166285578  | -0.120474414 | 0.000000000 |
| H | 3.527804421  | 1.523450690  | 0.000000000 |
| N | 2.028263251  | -1.376889491 | 0.000000000 |
| C | 0.793098252  | -1.936216032 | 0.000000000 |
| H | 0.777668706  | -3.029114650 | 0.000000000 |
| N | -0.409067604 | -1.330122131 | 0.000000000 |
| C | -0.262301598 | 0.009715703  | 0.000000000 |
| H | -2.256078322 | 0.790308420  | 0.000000000 |
| H | 2.205088123  | 3.248365549  | 0.000000000 |
| O | 3.173211100  | 3.415256144  | 0.000000000 |
| H | 3.289260365  | 4.371761668  | 0.000000000 |

(e) adenine-H<sub>2</sub>O complex

|   |              |              |              |
|---|--------------|--------------|--------------|
| N | -1.464077341 | 0.856957430  | 0.000000000  |
| C | -0.891473497 | 2.107384849  | 0.000000000  |
| H | -1.493547731 | 3.013784553  | 0.000000000  |
| N | 0.447286050  | 2.084707228  | 0.000000000  |
| C | 0.742127858  | 0.731209233  | 0.000000000  |
| C | 1.970620888  | 0.025162632  | 0.000000000  |
| N | 3.169730116  | 0.666126139  | 0.000000000  |
| H | 4.020610910  | 0.120800993  | 0.000000000  |
| H | 3.202088595  | 1.676260758  | 0.000000000  |
| N | 1.946803362  | -1.324090042 | 0.000000000  |
| C | 0.741174709  | -1.949472324 | 0.000000000  |
| H | 0.784985056  | -3.041586357 | 0.000000000  |
| N | -0.492223719 | -1.408057668 | 0.000000000  |
| C | -0.426916139 | -0.055842924 | 0.000000000  |
| H | -2.451500518 | 0.587850671  | 0.000000000  |
| H | -3.119443753 | -1.505811827 | 0.747044604  |
| H | -3.119443753 | -1.505811827 | -0.747044604 |
| O | -3.566801092 | -1.079571517 | 0.000000000  |

(f) adenine-H<sub>2</sub>O complex

|   |              |             |             |
|---|--------------|-------------|-------------|
| N | -1.121200058 | 0.926579329 | 0.000000000 |
| C | -0.550248627 | 2.181494278 | 0.000000000 |
| H | -1.154294433 | 3.086602002 | 0.000000000 |
| N | 0.785480747  | 2.155184081 | 0.000000000 |
| C | 1.080346569  | 0.800349093 | 0.000000000 |
| C | 2.315924111  | 0.102389402 | 0.000000000 |
| N | 3.508115825  | 0.748415713 | 0.000000000 |
| H | 4.369751544  | 0.204945161 | 0.000000000 |

|   |              |              |              |
|---|--------------|--------------|--------------|
| H | 3.517972269  | 1.759324076  | 0.000000000  |
| N | 2.287797946  | -1.252129178 | 0.000000000  |
| C | 1.078592049  | -1.876972049 | 0.000000000  |
| H | 1.121766827  | -2.969282191 | 0.000000000  |
| N | -0.153001028 | -1.338209054 | 0.000000000  |
| C | -0.084684638 | 0.010178966  | 0.000000000  |
| H | -2.110966327 | 0.704605864  | 0.000000000  |
| O | 5.349982717  | -1.584729420 | 0.000000000  |
| H | 4.800374072  | -1.870031889 | -0.745514177 |
| H | 4.800374072  | -1.870031889 | 0.745514177  |

(g) (adenine+H) radical

|   |              |              |             |
|---|--------------|--------------|-------------|
| N | -0.095409000 | 1.921969900  | 0.000000000 |
| C | 0.183404000  | 0.563888200  | 0.000000000 |
| N | -0.996185100 | -1.555520800 | 0.000000000 |
| C | 0.298789200  | -2.183371200 | 0.000000000 |
| N | 1.459360800  | -1.457498300 | 0.000000000 |
| C | -0.987157000 | -0.186586400 | 0.000000000 |
| N | -2.005161800 | 0.738691000  | 0.000000000 |
| C | -1.408715400 | 1.993564300  | 0.000000000 |
| C | 1.445216500  | -0.154638600 | 0.000000000 |
| N | 2.597921500  | 0.569391600  | 0.000000000 |
| H | -2.003214800 | 2.903734900  | 0.000000000 |
| H | 3.484773700  | 0.085419300  | 0.000000000 |
| H | 2.557346700  | 1.578575000  | 0.000000000 |
| H | 0.315155400  | -3.266688600 | 0.000000000 |
| H | -3.002052800 | 0.554454600  | 0.000000000 |
| H | -1.844072100 | -2.105384900 | 0.000000000 |

(h) (adenine+H)-H<sub>2</sub>O radical

|   |              |              |             |
|---|--------------|--------------|-------------|
| N | -1.091579200 | 0.332466300  | 0.000000000 |
| C | 0.033575300  | -0.455487800 | 0.000000000 |
| C | 1.103776500  | 0.431214300  | 0.000000000 |
| N | 0.657422000  | 1.745024600  | 0.000000000 |
| C | -0.655567900 | 1.648066200  | 0.000000000 |
| N | 0.182318500  | -1.814950600 | 0.000000000 |
| C | 1.537696400  | -2.286099600 | 0.000000000 |
| N | 2.608261400  | -1.427480100 | 0.000000000 |
| C | 2.440165500  | -0.134876300 | 0.000000000 |
| N | 3.502465800  | 0.718784200  | 0.000000000 |
| O | -2.933885300 | -1.966746900 | 0.000000000 |
| H | -1.356295600 | 2.479431600  | 0.000000000 |
| H | 4.439275900  | 0.340879700  | 0.000000000 |
| H | 3.344232500  | 1.716195200  | 0.000000000 |

|   |              |              |              |
|---|--------------|--------------|--------------|
| H | 1.685933400  | -3.359457300 | 0.000000000  |
| H | -2.045645100 | -0.018046300 | 0.000000000  |
| H | -0.617641100 | -2.434203000 | 0.000000000  |
| H | -3.424431400 | -2.302169600 | -0.762890800 |
| H | -3.424431400 | -2.302169600 | 0.762890800  |
